# Supplementary material for: Syntheses, Structures, and Corrosion Inhibition of Various Alkali Metal Carboxylate Complexes
Source: MDPI journal article supplement (doi:10.3390/molecules28145515), 2023-07-19
Supplement: s1 [file s1]

## Supplementary Material

### Content:

1. **Table S1:** Crystal data and structural refinement for the alkali metal carboxylate complexes
2. **Table S2:** Selected bond lengths and M...M distances (Å) for  $[M(3tpc)]_n$  **1M** series (M=Li, K, Rb, Cs).
3. **Table S3.** Selected bond angles (°) for  $[M(3tpc)]_n$  **1M** series (M=Li, K, Rb).
4. **Table S4.** Selected bond lengths and M...M distances (Å) for  $[M(2m3fur)]_n$  **2M** series (M=Li, K).
5. **Table S5.** Selected bond angles (°) for  $[M(2m3fur)]_n$  **2M** series (M=Li, K).
6. **Table S6.** Selected bond lengths and M...M distances (Å) for  $[Li(3fur)]_n$  (**3Li**).
7. **Table S7.** Selected bond angles (°) for  $[Li(3fur)]_n$  (**3Li**).
8. **Table S8.** Selected bond lengths and M...M distances (Å) for  $[M(4hocin)]_n$  **4M** series (M=K, Rb, Cs).
9. **Table S9.** Selected bond angles (°) for the  $[M(4hocin)]_n$  **4M** series (M=K, Rb, Cs).
10. **Table S10.** Selected bond lengths and M...M distances (Å) for  $[M(4hob)]_n$  **5M** series (M=Li, K, Rb, Cs).
11. **Table S11.** Selected bond angles (°) for the  $[M(4hob)]_n$  **5M** series (M=Li, K, Rb, Cs).
12. **Table S12.** Hydrogen bonding Parameters [d/Å and </°] for the compounds **1Rb, 4K, 4Rb, 4Cs, 5K, 5Cs**
13. **Figure S1.** TGA plots of  $[M(3tpc)]_n$  **1M** series (M=Na, Li, K, Rb, Cs)
14. **Figure S2.** PXRD traces of  $[M(3tpc)]_n$  (M=Na, Li, K, Rb, Cs) **1M** series at room temperature compared to their simulated patterns
15. **Figure S3.** IR spectra of  $[M(3tpc)]_n$  **1M** series (M=Na, Li, K, Rb, Cs)
16. **Figure S4.** TGA plots of  $[M(2m3fur)]_n$  **2M** series (M=Na, Li, K)
17. **Figure S5.** PXRD traces of  $[M(2m3fur)]_n$  **2M** series (M=Na, Li, K) series at room temperature compared to their simulated patterns
18. **Figure S6.** IR spectra of  $[M(2m3fur)]_n$  **2M** series (M=Na, Li, K)
19. **Figure S7.** TGA plots of  $[Na_3fur]$  and  $[Li(3fur)]_n$  (**3Li**)
20. **Figure S8.** PXRD traces of  $[Na_3fur]$  and  $[Li(3fur)]_n$  (**3Li**) at room temperature compared to the simulated pattern of **3Li**
21. **Figure S9.** IR spectra of  $[Na_3fur]$  and  $[Li(3fur)]_n$  (**3Li**)
22. **Figure S10.** TGA plots of  $[M(4hocin)]_n$  **4M** series (M=Na, K, Rb, Cs).
23. **Figure S11.** PXRD traces of  $[M(4hocin)]_n$  **4M** series (M=Na, K, Rb, Cs) series at room temperature compared to their simulated patterns
24. **Figure S12.** IR spectra of  $[M(4hocin)]_n$  **4M** series (M=Na, K, Rb, Cs).
25. **Figure S13.** TGA plots of  $[M(4hob)]_n$  **5M** series (M=Na, Li, K, Rb, Cs).
26. **Figure S14.** PXRD traces of  $[M(4hob)]_n$  **5M** series (M=Na, Li, K, Rb, Cs) series at room temperature compared to their simulated patterns
27. **Figure S15.** IR spectra of  $[M(4hob)]_n$  **5M** series (M=Na, Li, K, Rb, Cs).
28. **Figure S16.** Mild steel coupons immersed in control and the inhibited solutions for 168 h (Left – Trial 1; right – Trial 2.)

|                                                    | <b>Table S1.</b> Crystal data and structural refinement for alkali metal carboxylate complexes |                                                                             |                                                  |                                                                |                                                                         |                                                                        |                                                |
|----------------------------------------------------|------------------------------------------------------------------------------------------------|-----------------------------------------------------------------------------|--------------------------------------------------|----------------------------------------------------------------|-------------------------------------------------------------------------|------------------------------------------------------------------------|------------------------------------------------|
|                                                    | <b>1Li</b>                                                                                     | <b>1K</b>                                                                   | <b>1Rb</b>                                       | <b>1Cs</b>                                                     | <b>2Li</b>                                                              | <b>2K</b>                                                              | <b>3Li</b>                                     |
|                                                    | <b>[Li<sub>2</sub>(3tpc)<sub>2</sub>]<sub>n</sub></b>                                          | <b>[K<sub>2</sub>(3tpc)<sub>2</sub>]<sub>n</sub></b>                        | <b>[Rb(3tpc)(H<sub>2</sub>O)]<sub>n</sub></b>    | <b>[Cs{H(3tpc)<sub>2</sub>}]<sub>n</sub></b>                   | <b>[Li<sub>2</sub>(2m3fur)<sub>2</sub>(H<sub>2</sub>O)<sub>3</sub>]</b> | <b>[K<sub>2</sub>(2m3fur)<sub>2</sub>(H<sub>2</sub>O)]<sub>n</sub></b> | <b>[Li(3fur)]<sub>n</sub></b>                  |
| Formula                                            | C <sub>10</sub> H <sub>6</sub> Li <sub>2</sub> O <sub>4</sub> S <sub>2</sub>                   | C <sub>10</sub> H <sub>6</sub> K <sub>2</sub> O <sub>4</sub> S <sub>2</sub> | C <sub>3</sub> H <sub>5</sub> O <sub>3</sub> RbS | C <sub>10</sub> H <sub>7</sub> CsO <sub>4</sub> S <sub>2</sub> | C <sub>12</sub> H <sub>16</sub> Li <sub>2</sub> O <sub>9</sub>          | C <sub>12</sub> H <sub>12</sub> K <sub>2</sub> O <sub>7</sub>          | C <sub>5</sub> H <sub>3</sub> LiO <sub>3</sub> |
| <i>M<sub>r</sub></i>                               | 268.15                                                                                         | 332.47                                                                      | 230.62                                           | 388.19                                                         | 318.13                                                                  | 346.42                                                                 | 118.01                                         |
| Space group                                        | <i>Pna</i> 2 <sub>1</sub>                                                                      | <i>Pca</i> 2 <sub>1</sub>                                                   | <i>P</i> 2 <sub>1</sub> / <i>c</i>               | <i>C</i> 2/ <i>c</i>                                           | <i>Pbcn</i>                                                             | <i>P</i> 2 <sub>1</sub> / <i>c</i>                                     | <i>P</i> 2 <sub>1</sub> / <i>c</i>             |
| <i>a</i> (Å)                                       | 8.2726(2)                                                                                      | 11.2493(2)                                                                  | 16.150(3)                                        | 28.169(6)                                                      | 7.2566(15)                                                              | 13.830(3)                                                              | 11.110(2)                                      |
| <i>b</i> (Å)                                       | 5.2114(1)                                                                                      | 3.97510(10)                                                                 | 3.9200(8)                                        | 3.9620(8)                                                      | 8.3455(17)                                                              | 7.4700(15)                                                             | 5.3200(11)                                     |
| <i>c</i> (Å)                                       | 26.1699(6)                                                                                     | 28.4846(5)                                                                  | 11.610(2)                                        | 11.582(2)                                                      | 25.301(5)                                                               | 14.050(3)                                                              | 8.2900(17)                                     |
| <i>α</i> (°)                                       | 90                                                                                             | 90                                                                          | 90                                               | 90                                                             | 90                                                                      | 90                                                                     | 90                                             |
| <i>β</i> (°)                                       | 90                                                                                             | 90                                                                          | 95.06(3)                                         | 106.22(3)                                                      | 90                                                                      | 91.50(3)                                                               | 90.43(3)                                       |
| <i>γ</i> (°)                                       | 90                                                                                             | 90                                                                          | 90                                               | 90                                                             | 90                                                                      | 90                                                                     | 90                                             |
| <i>V</i> (Å <sup>3</sup> )                         | 1128.23(4)                                                                                     | 1273.75(5)                                                                  | 732.1(3)                                         | 1241.2(5)                                                      | 1532.3(5)                                                               | 1451.0(5)                                                              | 489.97(17)                                     |
| <i>Z</i>                                           | 4                                                                                              | 4                                                                           | 4                                                | 4                                                              | 4                                                                       | 4                                                                      | 4                                              |
| <i>ρ</i> <sub>calc</sub> , g cm <sup>-3</sup>      | 1.579                                                                                          | 1.734                                                                       | 2.092                                            | 2.077                                                          | 1.379                                                                   | 1.586                                                                  | 1.600                                          |
| <i>μ</i> , mm <sup>-1</sup>                        | 4.279                                                                                          | 9.691                                                                       | 6.988                                            | 3.317                                                          | 1.002                                                                   | 0.682                                                                  | 0.130                                          |
| <i>N<sub>τ</sub></i>                               | 7684                                                                                           | 13706                                                                       | 15745                                            | 6572                                                           | 4655                                                                    | 22578                                                                  | 7697                                           |
| <i>N</i> ( <i>R</i> <sub>int</sub> )               | 1675 (0.0397)                                                                                  | 1995(0.0819)                                                                | 1295(0.0584)                                     | 1062(0.0993)                                                   | 1499(0.0335)                                                            | 2553(0.0640)                                                           | 862(0.0534)                                    |
| <i>R</i> <sub>1</sub> ( <i>I</i> > 2σ( <i>I</i> )) | 0.0334                                                                                         | 0.0552                                                                      | 0.0299                                           | 0.0427                                                         | 0.0383                                                                  | 0.0287                                                                 | 0.0407                                         |
| <i>wR</i> <sub>2</sub> (all data)                  | 0.0858                                                                                         | 0.1419                                                                      | 0.0829                                           | 0.1014                                                         | 0.1022                                                                  | 0.0921                                                                 | 0.0989                                         |
| GOF                                                | 1.112                                                                                          | 1.059                                                                       | 1.095                                            | 1.094                                                          | 1.056                                                                   | 1.144                                                                  | 1.113                                          |

|                                                    | 4K                                             | 4Rb                                                          | 4Cs                                            | 5Li                                            | 5K                                             | 5Rb                                             | 5Cs                                            |
|----------------------------------------------------|------------------------------------------------|--------------------------------------------------------------|------------------------------------------------|------------------------------------------------|------------------------------------------------|-------------------------------------------------|------------------------------------------------|
|                                                    | [K(4hocin)(H <sub>2</sub> O)] <sub>3</sub> n   | [Rb[H(4hocin) <sub>2</sub> ]] <sub>n</sub> ·H <sub>2</sub> O | [Cs(4hocin)(H <sub>2</sub> O)] <sub>n</sub>    | [Li(4hob)] <sub>n</sub>                        | [K(4hob)(H <sub>2</sub> O)] <sub>3</sub> n     | [Rb(4hob)(H <sub>2</sub> O)] <sub>n</sub>       | [Cs(4hob)(H <sub>2</sub> O)] <sub>n</sub>      |
| Formula                                            | C <sub>9</sub> H <sub>13</sub> KO <sub>6</sub> | C <sub>18</sub> H <sub>17</sub> O <sub>7</sub> Rb            | C <sub>9</sub> H <sub>9</sub> CsO <sub>4</sub> | C <sub>7</sub> H <sub>5</sub> LiO <sub>3</sub> | C <sub>7</sub> H <sub>11</sub> KO <sub>6</sub> | C <sub>7</sub> H <sub>7</sub> O <sub>4</sub> Rb | C <sub>7</sub> H <sub>7</sub> CsO <sub>4</sub> |
| <i>M<sub>r</sub></i>                               | 256.29                                         | 430.79                                                       | 314.07                                         | 144.05                                         | 230.26                                         | 240.60                                          | 288.04                                         |
| Space group                                        | <i>P</i> 2 <sub>1</sub> / <i>c</i>             | <i>C</i> 2/ <i>c</i>                                         | <i>P</i> 2 <sub>1</sub>                        | <i>P</i> 2 <sub>1</sub> / <i>c</i>             | <i>P</i> 2 <sub>1</sub> / <i>c</i>             | <i>P</i> 2 <sub>1</sub> / <i>c</i>              | <i>P</i> 2 <sub>1</sub> / <i>c</i>             |
| <i>a</i> (Å)                                       | 14.430(3)                                      | 21.901(4)                                                    | 4.3870(9)                                      | 14.904(3)                                      | 12.343(3)                                      | 10.107(2)                                       | 10.120(2)                                      |
| <i>b</i> (Å)                                       | 11.130(2)                                      | 10.628(2)                                                    | 9.882(2)                                       | 5.0420(10)                                     | 11.252(2)                                      | 10.007(2)                                       | 10.100(2)                                      |
| <i>c</i> (Å)                                       | 7.0500(14)                                     | 7.3180(15)                                                   | 12.131(2)                                      | 8.4750(17)                                     | 7.0700(14)                                     | 8.0180(16)                                      | 8.6200(17)                                     |
| <i>α</i> (°)                                       | 90                                             | 90                                                           | 90                                             | 90                                             | 90                                             | 90                                              | 90                                             |
| <i>β</i> (°)                                       | 98.04(3)                                       | 97.94(3)                                                     | 98.13(3)                                       | 99.38(3)                                       | 102.18(3)                                      | 98.55(3)                                        | 102.88(3)                                      |
| <i>γ</i> (°)                                       | 90                                             | 90                                                           | 90                                             | 90                                             | 90                                             | 90                                              | 90                                             |
| <i>V</i> (Å <sup>3</sup> )                         | 1121.1(4)                                      | 1687.0(6)                                                    | 520.62(19)                                     | 628.3(2)                                       | 989.8(4)                                       | 801.9(3)                                        | 858.(9)                                        |
| <i>Z</i>                                           | 4                                              | 4                                                            | 2                                              | 4                                              | 4                                              | 4                                               | 4                                              |
| <i>ρ</i> <sub>calc</sub> , g cm <sup>-3</sup>      | 1.518                                          | 1.696                                                        | 2.003                                          | 1.523                                          | 1.593                                          | 1.993                                           | 2.227                                          |
| <i>μ</i> , mm <sup>-1</sup>                        | 0.484                                          | 2.975                                                        | 3.542                                          | 0.117                                          | 0.555                                          | 6.143                                           | 4.282                                          |
| <i>N<sub>τ</sub></i>                               | 24948                                          | 9183                                                         | 5565                                           | 1062                                           | 10907                                          | 8922                                            | 18355                                          |
| <i>N</i> ( <i>R<sub>int</sub></i> )                | 1979(0.0649)                                   | 1437(0.0292)                                                 | 1750(0.0694)                                   | 1062(twinned)                                  | 1679(0.0269)                                   | 1377(0.0237)                                    | 1471(0.0501)                                   |
| <i>R</i> <sub>1</sub> ( <i>I</i> > 2σ( <i>I</i> )) | 0.0351                                         | 0.0223                                                       | 0.0328                                         | 0.0334                                         | 0.0253                                         | 0.0148                                          | 0.0189                                         |
| <i>wR</i> <sub>2</sub> (all data)                  | 0.0963                                         | 0.0580                                                       | 0.0720                                         | 0.0950                                         | 0.0704                                         | 0.0412                                          | 0.0498                                         |
| GOF                                                | 1.092                                          | 1.190                                                        | 1.147                                          | 1.056                                          | 1.093                                          | 1.116                                           | 1.123                                          |

**Table S2.** Selected bond lengths and M...M distances (Å) for [M(3tpc)]<sub>n</sub> **1M** series (M=Li, K, Rb, Cs).

| <b>1Li</b>   |                     | <b>1K</b>    |                     | <b>1Rb</b>   |                     | <b>1Cs</b>   |                     |
|--------------|---------------------|--------------|---------------------|--------------|---------------------|--------------|---------------------|
| <b>Atoms</b> | <b>Bond Lengths</b> |
| Li1-O1       | 1.958(8)            | K1-O1        | 2.730(6)            | Rb1-O1       | 2.828(2)            | Cs1-O1       | 3.025(4)            |
| Li1-O3       | 1.924(8)            | K1-O2        | 3.155(7)            | Rb1-O3       | 3.000(2)            | Cs1-O1#3     | 3.025(4)            |
| Li1-O4#1     | 1.982(8)            | K1-O3        | 2.662(6)            | Rb1-O1#2     | 2.846(2)            | Cs1-O1#1     | 3.128(4)            |
| Li1-O2#2     | 1.989(8)            | K1-O4#4      | 2.662(6)            | Rb1-O2#6     | 2.920(2)            | Cs1-O1#4     | 3.128(3)            |
| Li2-O2       | 1.934(8)            | K1-O3#2      | 2.744(6)            | Rb1-O3#8     | 3.278(3)            | Cs1-O2#5     | 3.304(3)            |
| Li2-O4#4     | 1.966(8)            | K2-O2        | 2.688(6)            | Rb1-O3#4     | 3.043(2)            | Cs1-O2#8     | 3.304(3)            |
| Li2-O3#3     | 2.004(8)            | K2-O3        | 2.673(6)            | Rb1-O3#7     | 3.049(3)            | Cs1-O2#7     | 3.151(3)            |
| Li2-O1#4     | 1.947(8)            | K2-O4        | 3.117(6)            | Rb1...Rb1#1  | 5.1213(12)          | Cs1-O2#6     | 3.151(3)            |
| Li1...Li2    | 3.146(11)           | K2-O2#1      | 2.722(5)            | Rb1#7...Rb1  | 4.8220(13)          | Cs1...Cs1#2  | 3.962(8)            |
| Li1...Li2#1  | 3.116(10)           | K2-O1#6      | 2.635(6)            |              |                     |              |                     |
| Li2...Li1#4  | 3.116(10)           | K1...K2      | 4.208(2)            |              |                     |              |                     |
| Li1...Li2#2  | 2.712(9)            | K1...K2#4    | 4.108(2)            |              |                     |              |                     |
| Li2...Li1#3  | 2.712(9)            | K2...K1#6    | 4.058(2)            |              |                     |              |                     |
|              |                     | K1...K1#1    | 3.9751(1)           |              |                     |              |                     |
|              |                     | K2...K2#1    | 3.9751(1)           |              |                     |              |                     |

**Table S3.** Selected bond angles (°) for [M(3tpc)]<sub>n</sub> **1M** series (M=Li, K, Rb).

| <b>1Li</b>   |           | <b>1K</b>      |          | <b>1Rb</b>          |            |
|--------------|-----------|----------------|----------|---------------------|------------|
| Li1-O1-C1    | 139.3(4)  | K1#6...K2...K1 | 85.85(3) | Rb1#7...Rb1...Rb1#1 | 51.910(19) |
| Li2-O2-C1    | 115.9(3)  | K2...K1...K2#4 | 85.15(2) | O2#8-Rb1-O3#4       | 71.00(6)   |
| Li1-O4#4-Li2 | 105.6(4)  |                |          | O3#8-Rb1-O3         | 71.52(6)   |
| Li1-O3-C6    | 138.7(4)° |                |          | O3#8-Rb1-O3#4       | 71.00(6)   |
| Li2#1-O4-C6  | 115.6(3)° |                |          | O3#8-Rb1-O3#7       | 133.11(8)  |
|              |           |                |          | O3-Rb1-O3#7         | 74.28(7)   |
|              |           |                |          | O3-Rb1-O3#4         | 80.89(6)   |
|              |           |                |          | O3#7-Rb1-O3#4       | 74.74(7)   |

**Table S4.** Selected bond lengths and M...M distances (Å) for [M(2m3fur)]<sub>n</sub> **2M** series (M=Li, K).



| 2Li         |              | 2K        |              |
|-------------|--------------|-----------|--------------|
| Atoms       | Bond Lengths | Atoms     | Bond Lengths |
| Li1-O1      | 1.910(3)     | K1-O1     | 2.7019(12)   |
| Li1-O4      | 1.893(3)     | K1-O4     | 2.7397(12)   |
| Li1-O5      | 2.034(3)     | K1-O7#2   | 2.8308(12)   |
| Li1-O2#1    | 1.992(3)     | K1-O1#5   | 2.7025(12)   |
| Li1...Li1#1 | 2.758(5)     | K1-O4#5   | 2.8618(12)   |
|             |              | K1-O5#5   | 3.0462(13)   |
|             |              | K1-O7#6   | 2.8843(12)   |
|             |              | K1-O2#4   | 2.9599(13)   |
|             |              | K2-O7     | 2.6942(12)   |
|             |              | K2-O5     | 2.6548(12)   |
|             |              | K2-O1#1   | 2.8213(13)   |
|             |              | K2-O2#1   | 2.8517(14)   |
|             |              | K2-O4#1   | 2.6833(12)   |
|             |              | K2-O2#3   | 2.7962(12)   |
|             |              | K1...K2   | 6.1085(12)   |
|             |              | K1...K2#7 | 3.6743(8)    |

**Table S5.** Selected bond angles (°) for [M(2m3fur)]<sub>n</sub> **2M** series (M=Li, K).

| 2Li           |            | 2K             |            | 2K (Cont.) |           |
|---------------|------------|----------------|------------|------------|-----------|
| O1-Li1-O2#1   | 123.49(14) | O4#5-C7#5-O5#5 | 124.09(14) | O5-K2-O4#1 | 153.67(4) |
| O1#1-Li1#1-O2 | 123.49(14) | O1#1-C1#1-O2#1 | 124.46(14) |            |           |
| Li1-O5-Li1#1  | 85.41(15)  | O7#2-K1-O7#6   | 148.20(3)  |            |           |
| O4-Li-O5      | 116.51(13) | O4-C7-O5       | 124.09(14) |            |           |
| O4#1-Li1#1-O5 | 116.51(13) | O4-K1-C7#5     | 168.53(4)  |            |           |
| O1-C6-O2      | 123.14(12) | O7-K2-O2#3     | 152.91(4)  |            |           |
|               |            |                |            |            |           |

**Table S6.** Selected bond lengths and M...M distances (Å) for [Li(3fur)]<sub>n</sub> (**3Li**).

| <b>3Li</b>   |                     |
|--------------|---------------------|
| <b>Atoms</b> | <b>Bond Lengths</b> |
| Li1- O1      | 1.935(3)            |
| Li1-O1#3     | 2.025(3)            |
| Li1-O2#5     | 1.996(3)            |
| Li1-O2#4     | 1.954(3)            |
| Li1...Li1#1  | 3.155(3)            |
| Li1...Li1#4  | 3.155(3)            |
| Li1...Li1#3  | 2.758(5)            |

**Table S7.** Selected bond angles (°) for [Li(3fur)]<sub>n</sub> (**3Li**).

| <b>3Li</b>          |            |
|---------------------|------------|
| Li1#1...Li1...Li1#4 | 114.93(16) |
| C1-O1-Li1           | 141.84(12) |
| C1-O2-Li1#1         | 116.97(12) |
| Li1-O2#4-Li1#1      | 106.05(9)  |
| Li1-O2#5-Li1#4      | 106.05(9)  |
| Li1#4-O1#4-C1#4     | 141.84(12) |

**Table S8.** Selected bond lengths and M...M distances (Å) for [M(4hocin)]<sub>n</sub> **4M** series (M=K, Rb, Cs).

| <b>4K</b>    |                     | <b>4Rb</b>   |                     | <b>4Cs</b>   |                     |
|--------------|---------------------|--------------|---------------------|--------------|---------------------|
| <b>Atoms</b> | <b>Bond Lengths</b> | <b>Atoms</b> | <b>Bond Lengths</b> | <b>Atoms</b> | <b>Bond Lengths</b> |
| K1-O1        | 2.7658(14)          | Rb1-O1       | 2.8868(12)          | Cs1-O1#1     | 3.138(5)            |
| K1-O1#1      | 2.9157(16)          | Rb1-O1#5     | 2.8868(12)          | Cs1-O1       | 3.020(5)            |
| K1-O4        | 2.8052(13)          | Rb1-O2#3     | 2.9685(13)          | Cs1-O2#1     | 3.788(6)            |
| K1-O4#1      | 3.1099(14)          | Rb1-O2#4     | 2.9685(13)          | Cs1-O2#2     | 3.059(6)            |
| K1-O4#3      | 2.9297 (13)         | Rb1-O3#1     | 2.9396(12)          | Cs1-O3#4     | 3.386(5)            |
| K1-O5        | 3.3762(14)          | Rb1-O3#2     | 2.9396(12)          | Cs1-O3#5     | 3.3069(5)           |
| K1-O5#3      | 3.3087(15)          |              |                     | Cs1-O4       | 3.310(5)            |
| K1-O6        | 2.7326(15)          |              |                     | Cs1-O4#3     | 3.788(5)            |

|              |            |  |  |             |           |
|--------------|------------|--|--|-------------|-----------|
| K1-O6#1      | 2.8497(16) |  |  | Cs1...Cs1#6 | 4.3870(9) |
| K1...K1#1    | 3.9478(7)  |  |  |             |           |
| K1...K1#3    | 4.0171(9)  |  |  |             |           |
| O4-K1-O4#1   | 132.96(4)  |  |  |             |           |
| O4-K1-O4#3   | 91.10(4)   |  |  |             |           |
| O4#1-K1-O4#3 | 135.77(17) |  |  |             |           |

**Table S9.** Selected bond angles (°) for [M(4hocin)]<sub>n</sub> **4M** series (M=K, Rb, Cs).

| <b>4K</b>        |           | <b>4K(cont.)</b> |             | <b>4Rb</b>    |          | <b>4CS</b>          |            |
|------------------|-----------|------------------|-------------|---------------|----------|---------------------|------------|
| K1#1...K1...K1#2 | 126.48(2) | O5-K1-O5#3       | 106.13(3)   | O3#1-Rb1-O3#2 | 67.40(5) | O4-Cs1-O4#3         | 138.84(10) |
| O4-K1-O5         | 70.01(4)  | O6-K1-O4#3       | 82.61(4)    | O3-Rb1#1-O1#1 | 67.40(5) | O1-Cs1-O2#2         | 72.29(12)  |
| O4-K1-O5#3       | 61.19(4)  | O6-K1-O4#1       | 70.29(4)    |               |          | O3#4-Cs1-O3#5       | 85.48(12)  |
| O4-K1-O6#2       | 73.35(4)  | O6-K1-O6#2       | 84.27(4)    |               |          | Cs1-O3#5-Cs1#6      | 85.48(12)  |
| O4-K1-O4#1       | 132.96(4) | O6-C1-O5#3       | 150.03(4)   |               |          | Cs1#1...Cs1...Cs1#6 | 180°       |
| O4-K1-O6         | 132.70(4) | O4#3-C1-O4#1     | 135.768(17) |               |          |                     |            |
| O4-K1-O4#3       | 91.10(4)  | O4#3-C1-O5#3     | 69.66(4)    |               |          |                     |            |
| O5-K1-O4#3       | 59.26(4)  | O4#3-C1-O6#2     | 143.32(4)   |               |          |                     |            |
| O5-K1-O6         | 66.60(4)  | O4#1-C1-O5#3     | 122.97(4)   |               |          |                     |            |
| O5-K1-O4#1       | 130.89(4) | O4#1-K1-O6#2     | 69.13(4)    |               |          |                     |            |
| O5-K1-O6#2       | 84.10(4)  | O5#3-K1-O6#2     | 124.90(4)   |               |          |                     |            |

**Table S10.** Selected bond lengths and M...M distances (Å) for [M(4hob)]<sub>n</sub> **5M** series (M=Li, K, Rb, Cs).

| <b>5Li</b>   |                     | <b>5K</b>    |                     | <b>5Rb</b>   |                     | <b>5Cs</b>   |                     |
|--------------|---------------------|--------------|---------------------|--------------|---------------------|--------------|---------------------|
| <b>Atoms</b> | <b>Bond Lengths</b> |
| Li1-O1       | 1.921(7)            | K1-O2        | 2.869.(13)          | Rb1-O1       | 2.844 (14)          | Cs1-O1       | 3.012(3)            |
| Li1-O1#3     | 1.969(8)            | K1-O2#1      | 2.917(15)           | Rb1-O1#1     | 2.997(14)           | Cs1-O1#1     | 3.166(3)            |
| Li1-O2#5     | 1.958(8)            | K1-O4        | 2.734(13)           | Rb1-O4       | 3.028(13)           | Cs1-O4       | 3.217(3)            |
| Li1-O2#4     | 1.962(7)            | K1-O5        | 2.939 (12)          | Rb1-O4#6     | 3.570 (16)          | Cs1-O4#6     | 3.761(3)            |
| Li1...Li1#2  | 3.086(8)            | K1-O6        | 3.021(13)           | Rb1-O2#4     | 2.947 (12)          | Cs1-O2#4     | 3.079(3)            |
| Li1...Li1#4  | 3.086(8)            | K1-O4#2      | 2.848(8)            | Rb1-O2#5     | 2.936 (12)          | Cs1-O2#5     | 3.136(3)            |
| Li1...Li1#3  | 2.700(14)           | K1-O5#3      | 2.799(5)            | Rb1-O3#2     | 2.946 (13)          | Cs1-O3#2     | 3.108(3)            |
|              |                     | K1-O5#4      | 3.172(5)            | Rb1-O3#3     | 3.120(15)           | Cs1-O3#3     | 3.253(3)            |
|              |                     | K1...K1#1    | 3.9243(7)           | Rb1...Rb1#1  | 4.0584(8)           | Cs1...Cs1#1  | 4.3322(9)           |

|  |  |           |           |  |  |  |
|--|--|-----------|-----------|--|--|--|
|  |  | K1...K1#2 | 3.9243(7) |  |  |  |
|--|--|-----------|-----------|--|--|--|

**Table S11.** Selected bond angles (°) for [M(4hob)]<sub>n</sub> **5M** series (M=Li, K, Rb, Cs).

| <b>5Li</b>          |          | <b>5K</b>        |            | <b>5Rb</b>          |            | <b>5Cs</b>          |            |
|---------------------|----------|------------------|------------|---------------------|------------|---------------------|------------|
| Li1#1...Li1...Li1#4 | 109.6(4) | K1#1...K1...K1#2 | 128.53(2)  | Rb1#1...Rb1...Rb1#7 | 162.109(5) | Cs1#1...Cs1...Cs1#7 | 168.391(8) |
| Li1-O1-C1           | 136.4(3) | O4-K1-O5         | 79.41(3)   | O3#2-Rb1-O3#3       | 100.26(4)  | O3#2-Cs1-O3#3       | 105.97(9)  |
| Li1#1-O2-C1         | 116.3(3) | O4-K1-O6         | 150.87(3)  | O4-Rb1-O4#6         | 82.89(4)   | O4-Cs1-O4#6         | 81.89(4)   |
| Li1-O2#4-Li1#1      | 103.9(2) | O5-K1-O6         | 73.92(3)   | Rb1-O3#2-Rb1#7      | 83.93(3)   | Cs1-O3#2-Cs1#7      | 85.82(7)   |
| Li1-O2#5-Li1#4      | 103.9(2) | O4-K1-O4#2       | 83.47(7)   |                     |            |                     |            |
| Li1#4-O1#4-C1#4     | 136.4(3) | O4-K1-O5#3       | 126.55(17) |                     |            |                     |            |
|                     |          | O4-K1-O5#4       | 65.96(5)   |                     |            |                     |            |
|                     |          | O5-K1-O5#3       | 88.46(12)  |                     |            |                     |            |
|                     |          | O5-K1-O5#4       | 135.06(11) |                     |            |                     |            |
|                     |          | O5-K1-O4#2       | 135.79(6)  |                     |            |                     |            |
|                     |          | O6-K1-O4#2       | 124.17(15) |                     |            |                     |            |
|                     |          | O6-K1-O5#3       | 64.79(2)   |                     |            |                     |            |
|                     |          | O6-K1-O5#4       | 128.46(8)  |                     |            |                     |            |
|                     |          | O4#2-K1-O5#3     | 69.92(19)  |                     |            |                     |            |
|                     |          | O4#2-K1-O5#4     | 69.359(13) |                     |            |                     |            |
|                     |          | O5#4-K1-O5#3     | 134.98(5)  |                     |            |                     |            |
|                     |          | K1-O2-K1#2       | 85.41(4)   |                     |            |                     |            |
|                     |          | O2-K1-O6         | 55.27(3)   |                     |            |                     |            |
|                     |          | O2-K1-O4         | 144.96(4)  |                     |            |                     |            |
|                     |          | O2-K1-O4         | 127.89(9)  |                     |            |                     |            |

**Table S12.** Hydrogen bonding Parameters [d/Å and </°] for compounds **1Rb**, **4K**, **4Rb**, **4Cs**, **5K**, **5Cs**

[Rb(3tpc)(H<sub>2</sub>O)] (**1Rb**)

| D-H...A         | d(D-H)     | d(H...A)  | d(D...A) | <(DHA)    |
|-----------------|------------|-----------|----------|-----------|
| O3#7-H3d#7...O2 | 0.8701(17) | 2.026(17) | 2.861(3) | 160.46(5) |
| O3-H3d...O2#7   | 0.8701(17) | 2.026(17) | 2.861(3) | 160.46(5) |

[K(4hocin)(H<sub>2</sub>O)] (**4K**)

| D-H...A       | d(D-H)     | d(H...A)   | d(D...A)   | <(DHA)    |
|---------------|------------|------------|------------|-----------|
| O5-H5a...O1#3 | 0.8503(12) | 1.908(13)  | 2.730(18)  | 162.41(9) |
| O3-H3d...O2#7 | 0.8701(17) | 2.065(12)  | 2.861(3)   | 160.46(5) |
| O5-H5b...O2#6 | 0.8499(13) | 2.065(12)  | 2.8636(18) | 156.38(9) |
| O6-H6a...O2#6 | 0.8500(13) | 2.0067(12) | 2.7491(18) | 145.41(9) |

|               |           |           |            |        |
|---------------|-----------|-----------|------------|--------|
| O4-H4b...O2#4 | 0.856(16) | 2.002(17) | 2.8539(18) | 174(2) |
| O4-H4a...O2#2 | 0.853(17) | 1.981(17) | 2.8331(18) | 176(3) |

[Rb{H(4hocin)<sub>2</sub>}]<sub>n</sub>.nH<sub>2</sub>O (**4Rb**)

|                |            |            |            |           |
|----------------|------------|------------|------------|-----------|
| D-H...A        | d(D-H)     | d(H...A)   | d(D...A)   | <(DHA)    |
| O3-H3...O4     | 0.8400(12) | 1.9027(14) | 2.7319(18) | 168.95(8) |
| O3#6-H3#6...O4 | 0.8400(12) | 1.9027(14) | 2.7319(18) | 168.95(8) |
| O4-H4B...O2#7  | 0.850(1)   | 1.8812(10) | 2.7139(15) | 166.05(3) |
| O4-H4A...O2#8  | 0.8506(10) | 1.8718(11) | 2.7139(15) | 170.22(4) |

[Cs(4hocin)(H<sub>2</sub>O)]<sub>n</sub> (**4Cs**)

|                 |          |          |          |          |
|-----------------|----------|----------|----------|----------|
| D-H...A         | d(D-H)   | d(H...A) | d(D...A) | <(DHA)   |
| O4-H4b...O1#7   | 0.870(5) | 1.923(5) | 2.703(7) | 148.5(4) |
| O4#3-H4b#3...O1 | 0.870(5) | 1.923(5) | 2.703(7) | 148.5(4) |

[K(4hob)(H<sub>2</sub>O)<sub>3</sub>]<sub>n</sub> (**5K**)

|               |            |            |            |           |
|---------------|------------|------------|------------|-----------|
| D-H...A       | d(D-H)     | d(H...A)   | d(D...A)   | <(DHA)    |
| O4-H4a...O1#4 | 0.8754(11) | 1.9342(11) | 2.7503(16) | 154.50(8) |
| O5-H5a...O1#4 | 0.8705(11) | 1.9513(11) | 2.7756(16) | 157.51(7) |
| O5-H5b...O1#1 | 0.8706(11) | 2.1136(11) | 2.8718(17) | 145.21(7) |
| O6-H6b...O1#2 | 0.8697(11) | 2.099(11)  | 2.8776(16) | 161.42(7) |

[Cs(4hob)(H<sub>2</sub>O)]<sub>n</sub> (**5Cs**)

|                 |          |          |          |          |
|-----------------|----------|----------|----------|----------|
| D-H...A         | d(D-H)   | d(H...A) | d(D...A) | <(DHA)   |
| O4-H4B...O1#6   | 0.850(3) | 1.956(3) | 2.742(4) | 153.2(2) |
| O4#6-H4B#6...O1 | 0.850(3) | 1.956(3) | 2.742(4) | 153.2(2) |

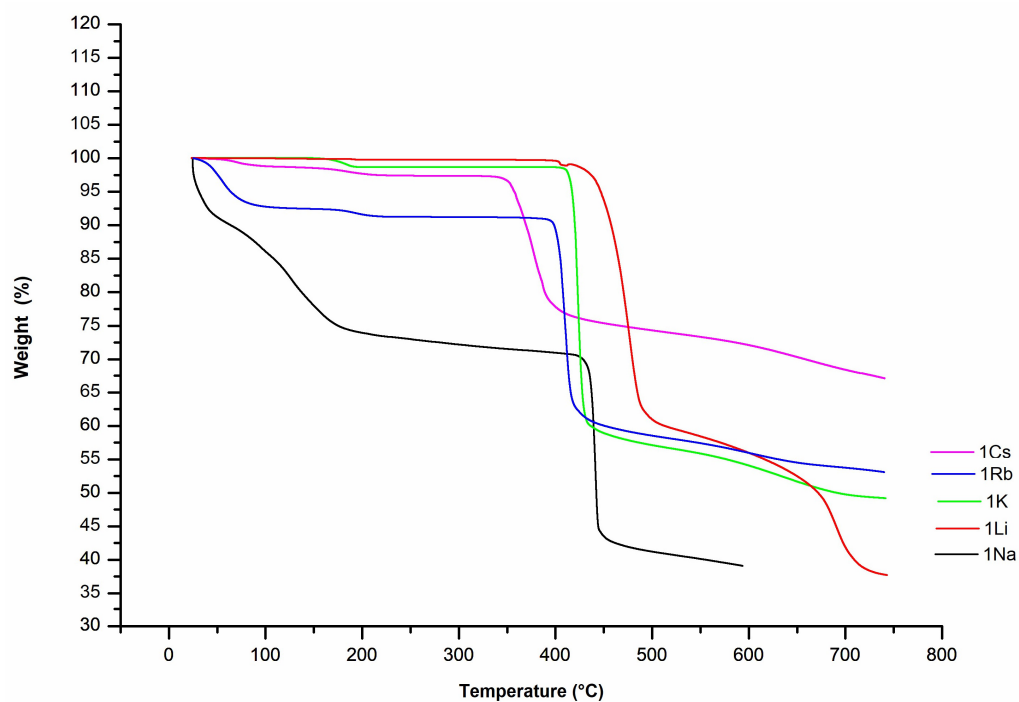

**Figure S1.** TGA plots of  $[M(3tpc)]_n$  1M series (M=Na, Li, K, Rb, Cs)

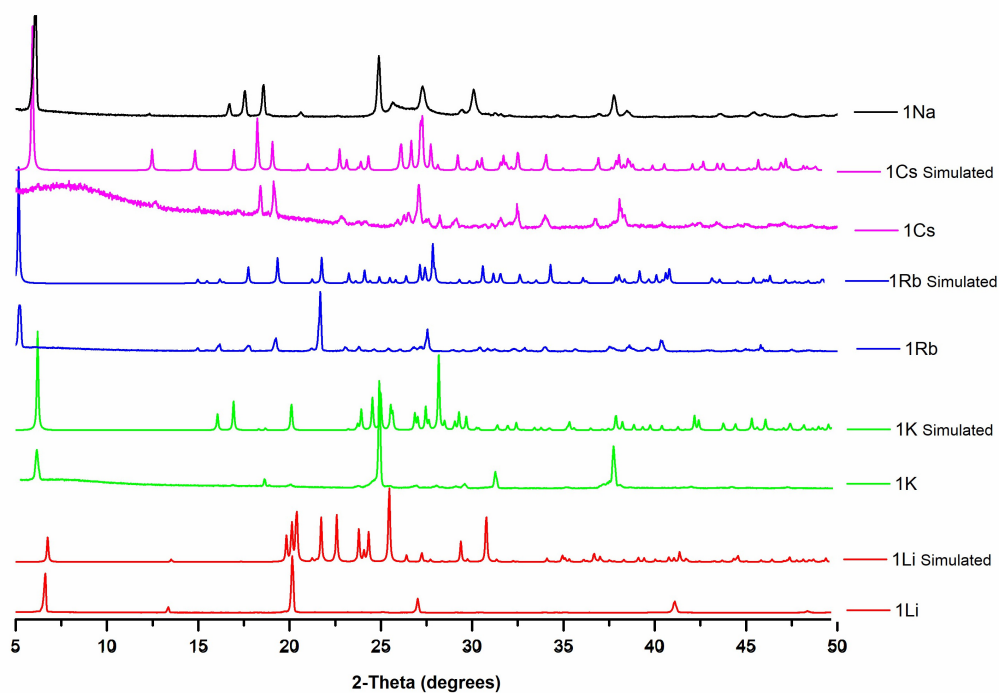

**Figure S2.** PXRD traces of  $[M(3tpc)]_n$  (M=Na, Li, K, Rb, Cs) 1M series at room temperature compared to their simulated patterns

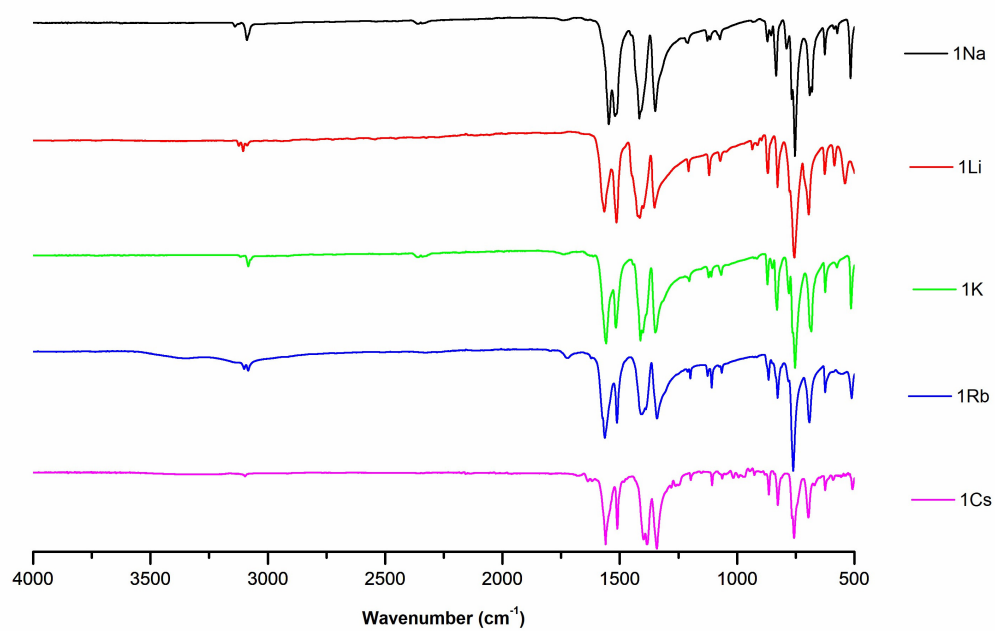

**Figure S3.** IR spectra of  $[M(3tpc)]_n$  1M series ( $M=Na, Li, K, Rb, Cs$ )

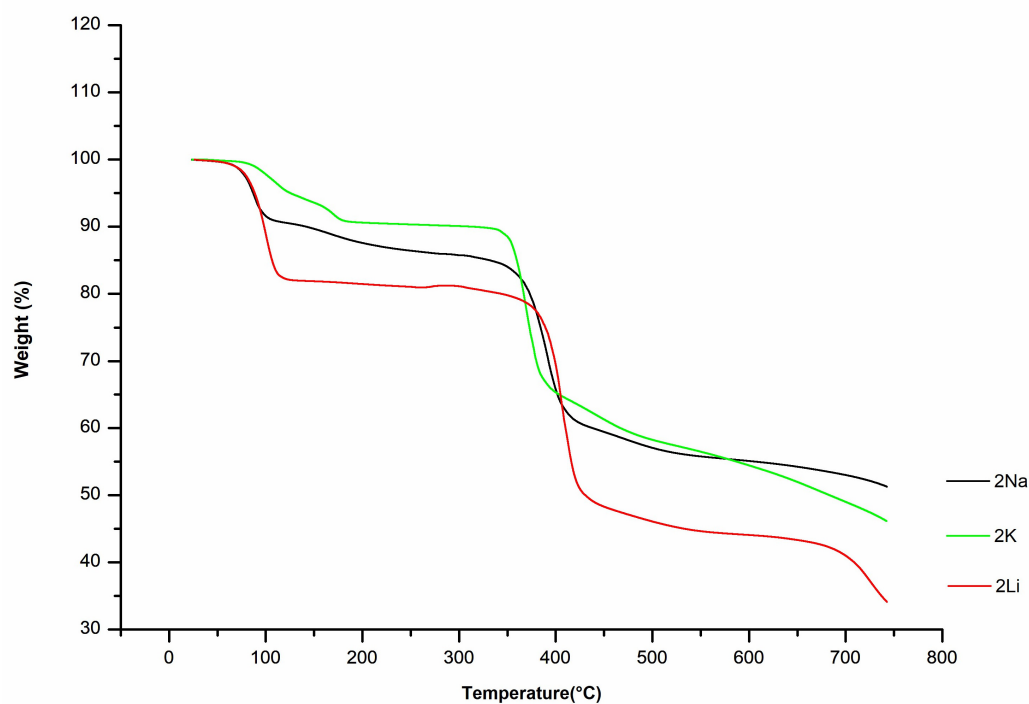

**Figure S4.** TGA plots of  $[M(2m3fur)]_n$  2M series ( $M=Na, Li, K$ )

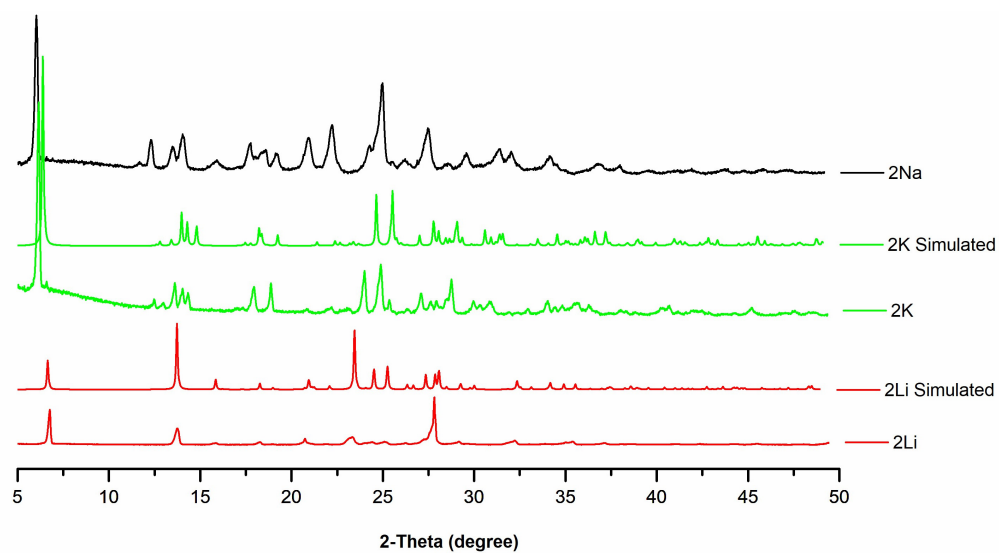

**Figure S5.** PXRD traces of  $[M(2m3fur)]_n 2M$  series ( $M=Na, Li, K$ ) series at room temperature compared to their simulated patterns

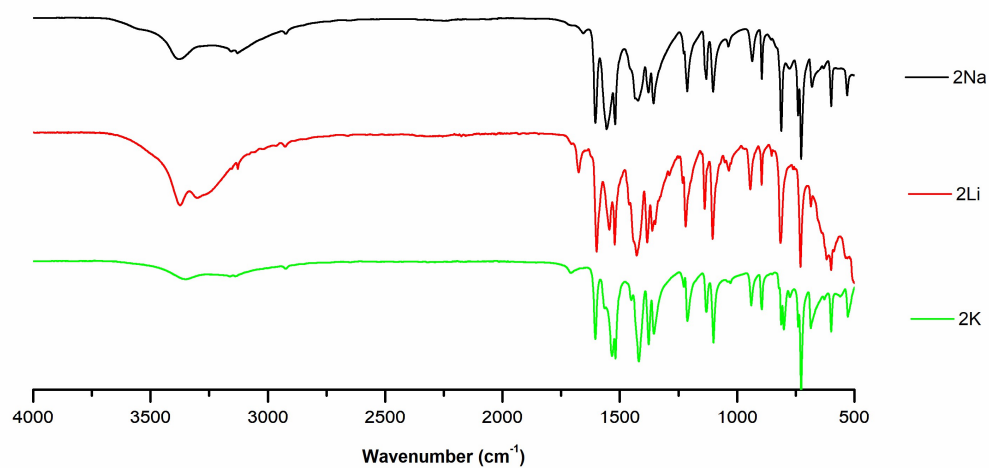

**Figure S6.** IR spectra of  $[M(2m3fur)]_n 2M$  series ( $M=Na, Li, K$ )



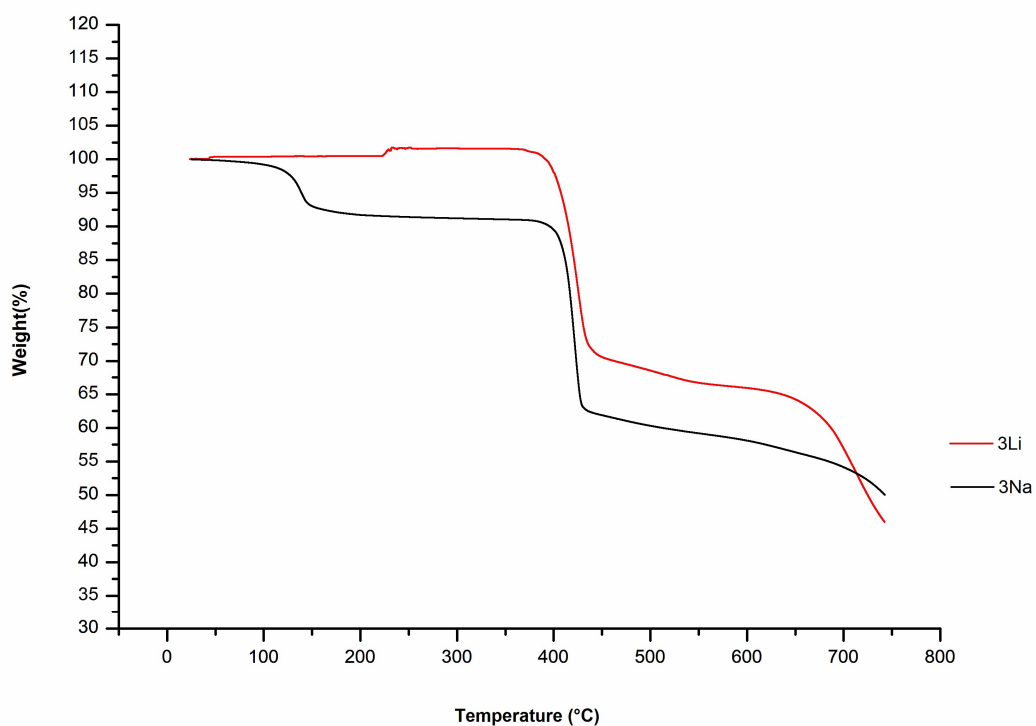

**Figure S7.** TGA plots of [Na3fur] and [Li(3fur)]<sub>n</sub> (**3Li**)

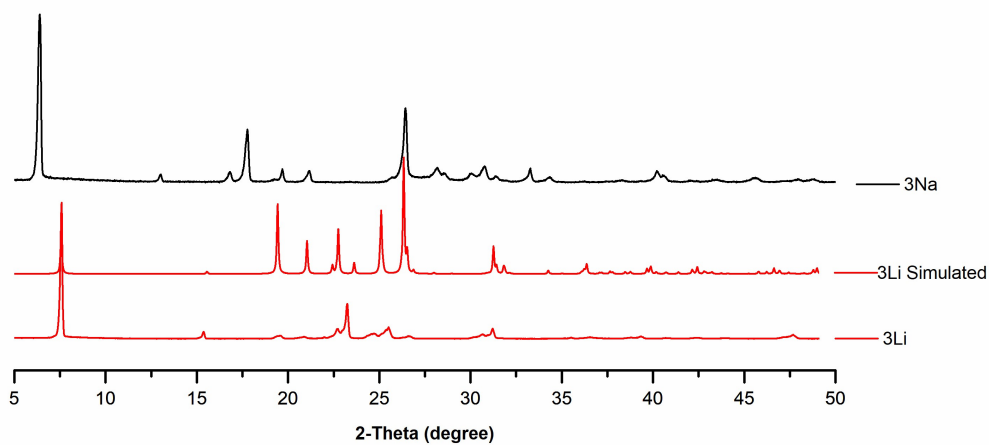

**Figure S8.** PXRD traces of [Na3fur] and [Li(3fur)]<sub>n</sub> (**3Li**) at room temperature compared to the simulated pattern of **3Li**

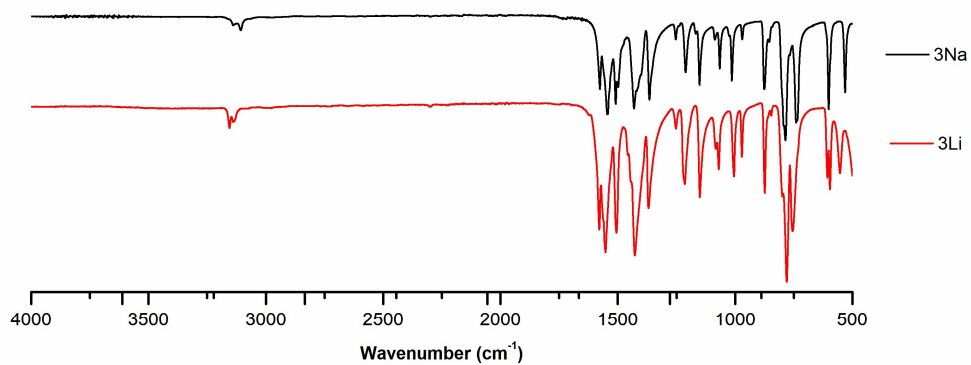

**Figure S9.** IR spectra of [Na3fur] and [Li(3fur)]<sub>n</sub> (**3Li**)

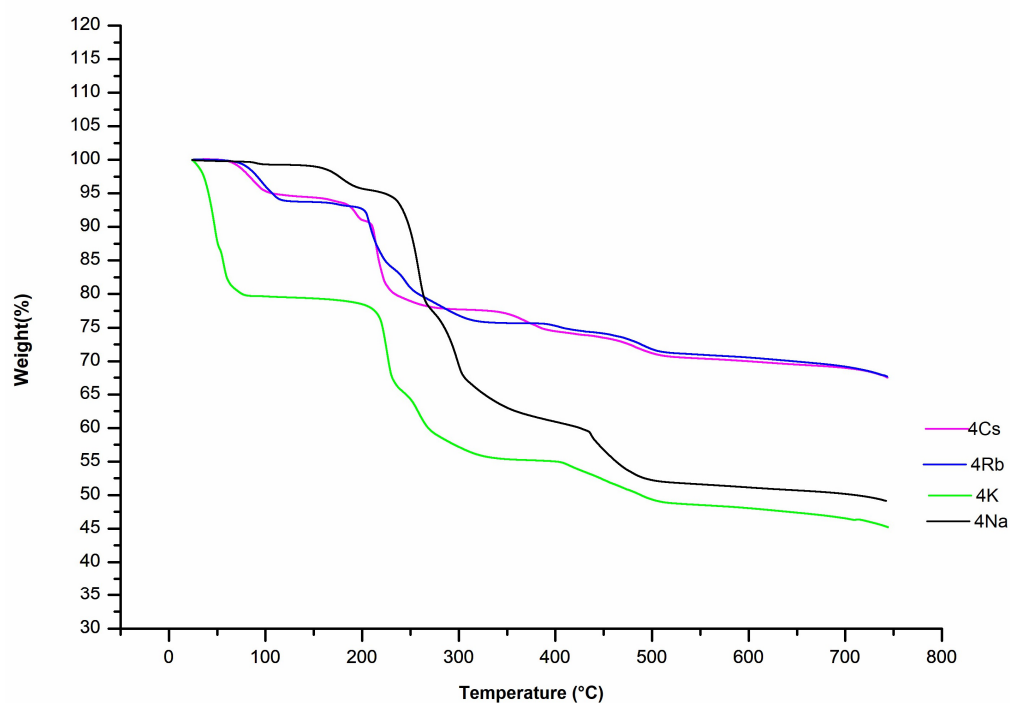

**Figure S10.** TGA plots of [M(4hocin)]<sub>n</sub> **4M** series (M=Na, K, Rb, Cs).

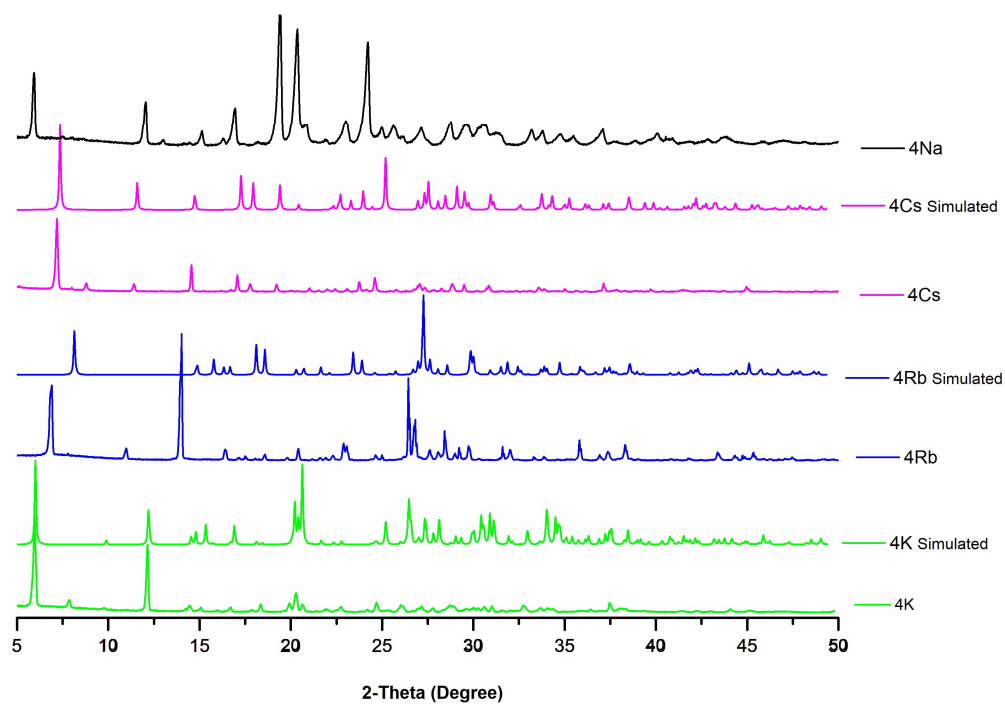

**Figure S11.** PXRD traces of  $[M(4hocin)]_n$  **4M** series (M=Na, K, Rb, Cs) series at room temperature compared to their simulated patterns

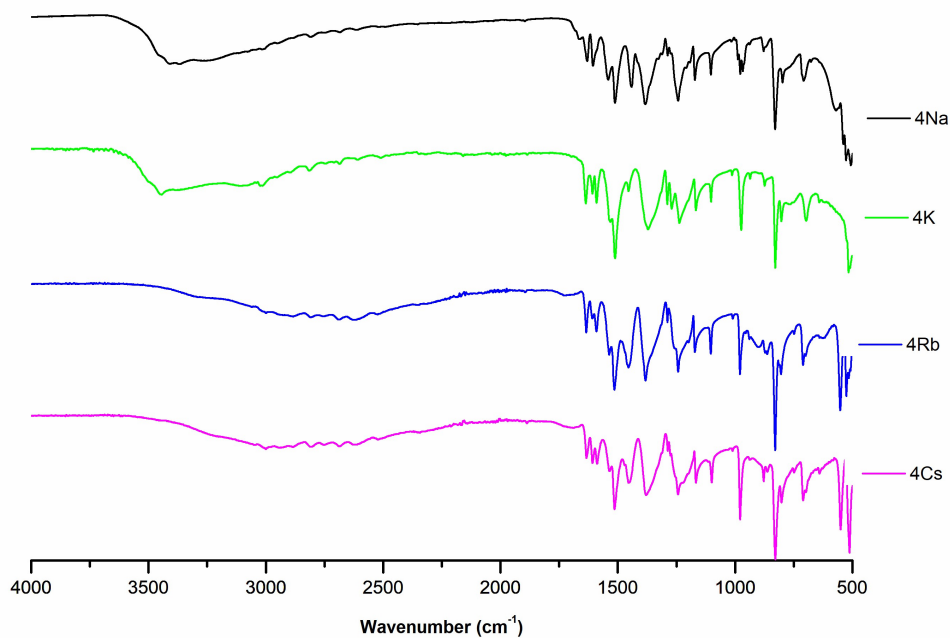

**Figure S12.** IR spectra of  $[M(4hocin)]_n$  **4M** series (M=Na, K, Rb, Cs).

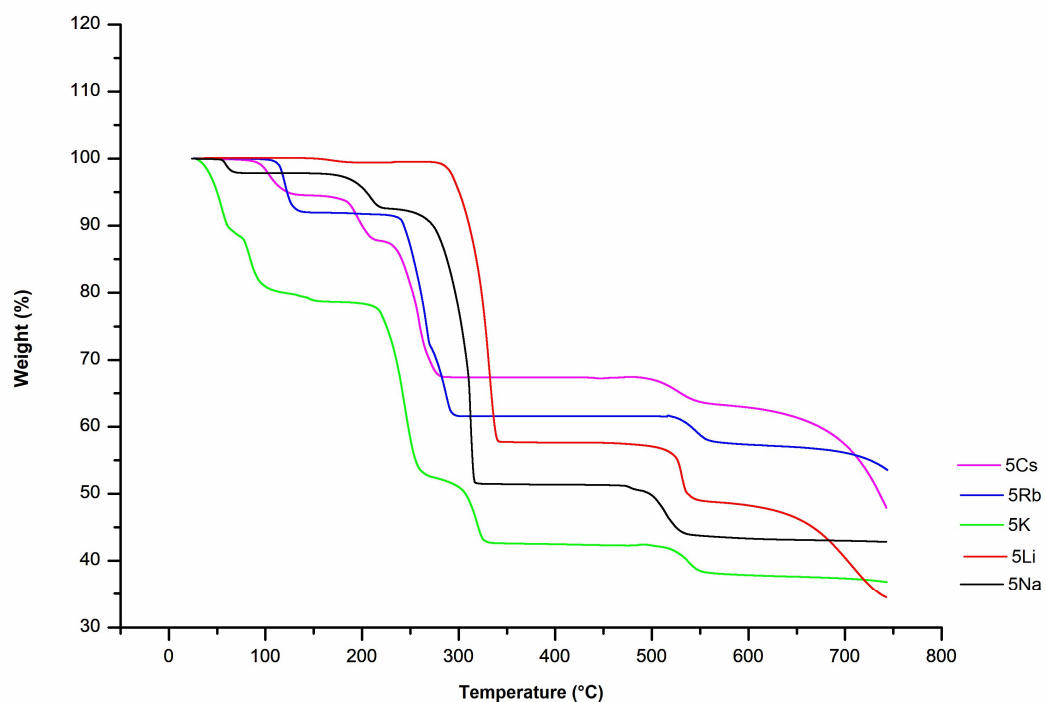

**Figure S13.** TGA plots of  $[M(4hob)]_n$  **5M** series (M=Na, Li, K, Rb, Cs).

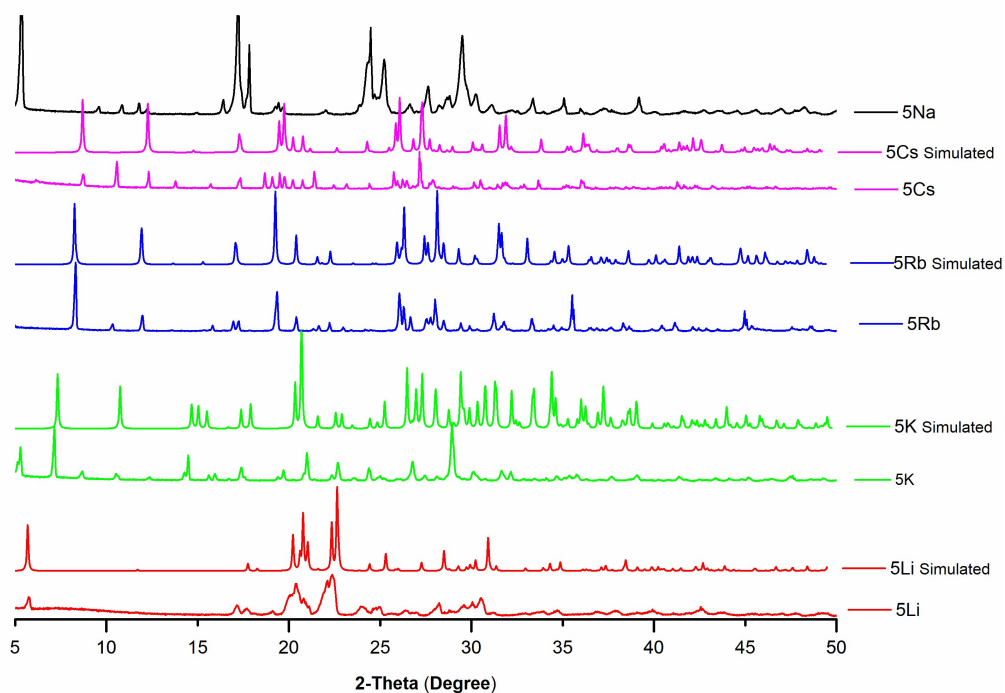

**Figure S14.** PXRD traces of  $[M(4hob)]_n$  **5M** series (M=Na, Li, K, Rb, Cs) series at room temperature compared to their simulated patterns

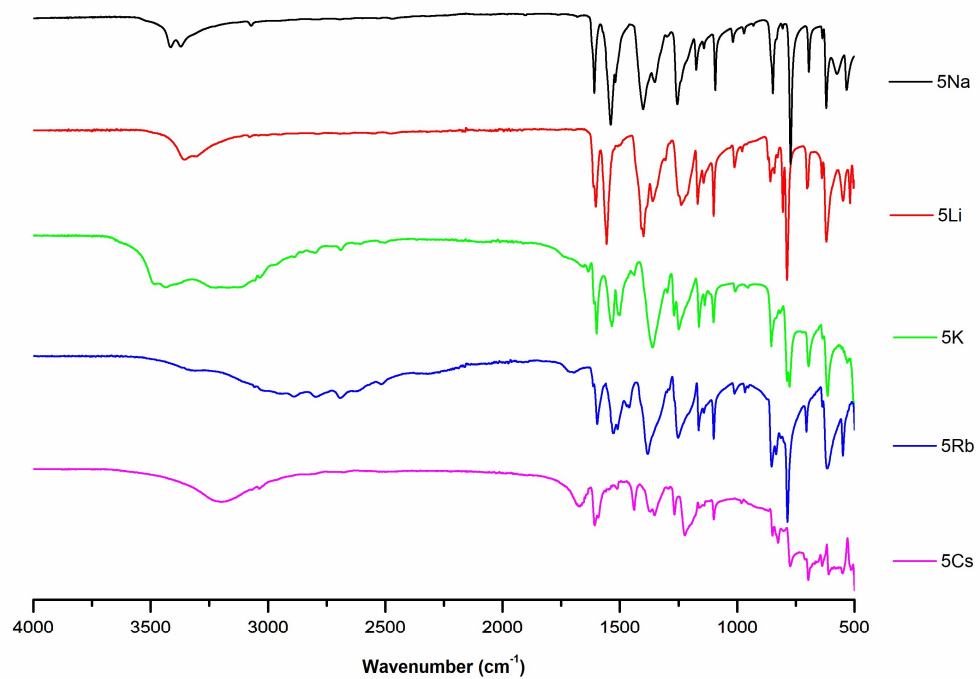

**Figure S15.** IR spectra of [M(4hob)]<sub>n</sub> **5M** series (M=Na, Li, K, Rb, Cs).

|                                                                      | Before cleaning<br>the corrosion<br>product                                         | After Cleaning the corrosion product                                                |
|----------------------------------------------------------------------|-------------------------------------------------------------------------------------|-------------------------------------------------------------------------------------|
| <b>Control</b><br><b>0.01 M NaCl</b>                                 |    |    |
| $[\text{Li}_2(3\text{tpc})_2]_n$<br><b>(1Li)</b>                     |    |    |
| $[\text{K}_2(3\text{tpc})_2]_n$<br><b>(1K)</b>                       |    |    |
| $[\text{Rb}(3\text{tpc})(\text{H}_2\text{O})]_n$<br><b>(1Rb)</b>     |    |    |
| $[\text{K}_2(2\text{m3fur})_2(\text{H}_2\text{O})]_n$<br><b>(2K)</b> |  |  |
| $[\text{Li}(3\text{fur})]_n$<br><b>(3Li)</b>                         |  |  |
| $[\text{K}(4\text{hocin})(\text{H}_2\text{O})_3]_n$<br><b>(4K)</b>   |  |  |
| $[\text{K}(4\text{HoB})(\text{H}_2\text{O})_3]_n$<br><b>(5K)</b>     |  |  |

**Figure S16.** Mild steel coupons immersed in control and the inhibited solutions for 168 h (Left – Trial 1; right – Trial 2.)
